# Supplementary material for: Paracrine Engineering of Human Cardiac Stem Cells With Insulin-Like Growth Factor 1 Enhances Myocardial Repair
Source: PubMed Central journal article supplement — J Am Heart Assoc. 2015 Sep 11;4(9):e002104. doi: 10.1161/JAHA.115.002104 (PMC4599498; doi:10.1161/jaha.115.002104), 2015-09-11
Supplement: jah30004-e002104-sd1.pdf [file jah30004-e002104-sd1.pdf]

## SUPPLEMENTAL MATERIAL

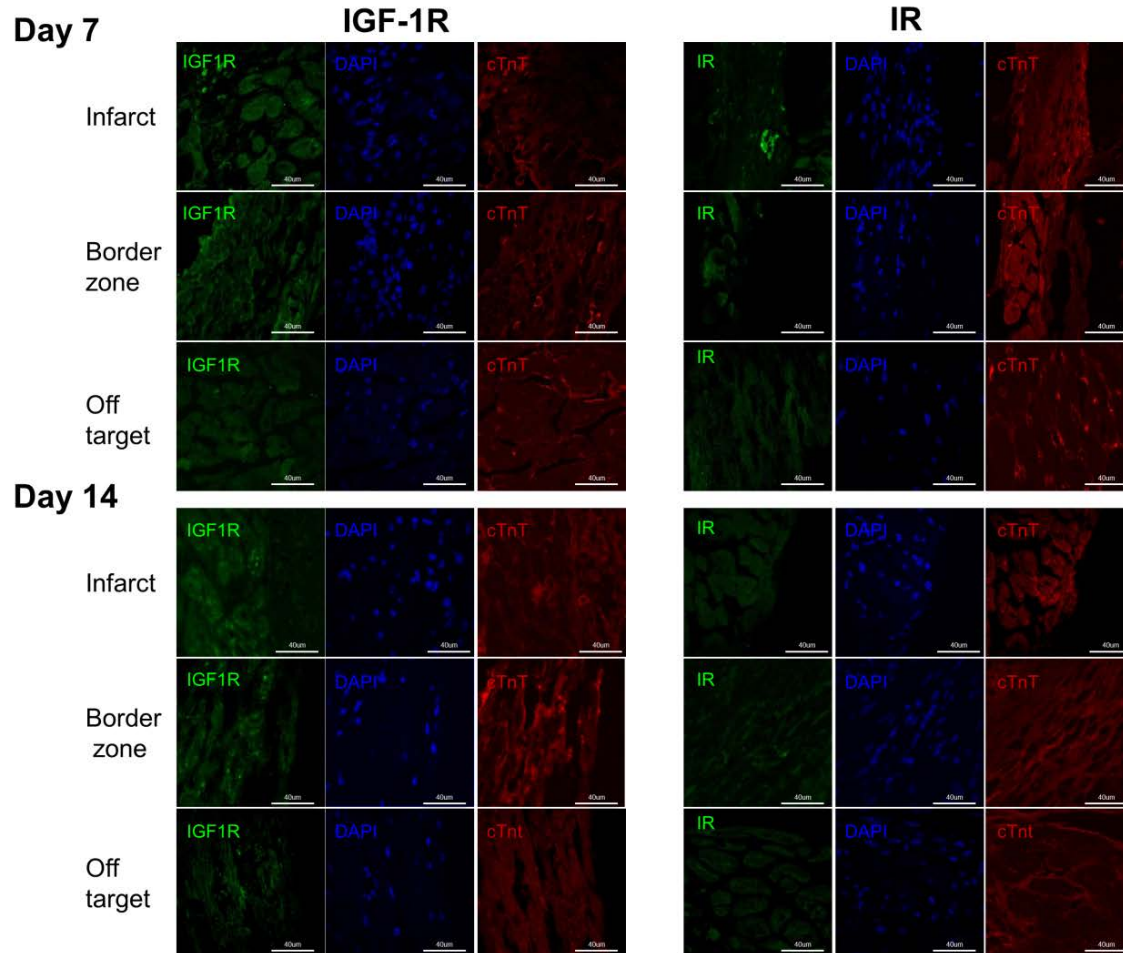

**Figure S1. Representative immunohistochemical images of the IGF-1 receptor (IGF-1R) or insulin receptor (IR) 7 and 24 days post myocardial infarction.**

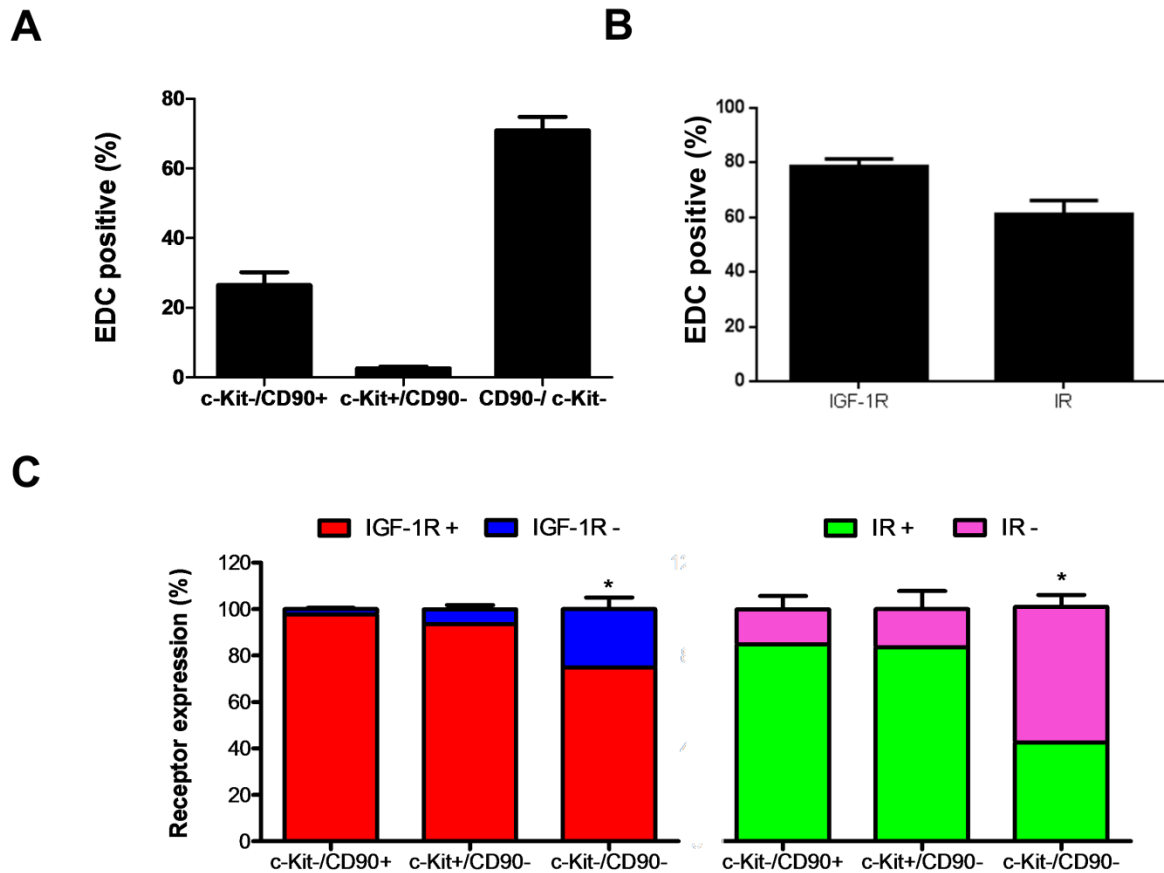

**Figure S2. Characterization of the EDC product used for experimentation.** A, Flow cytometry demonstrating the sub-fraction of cardiac (c-Kit+) and mesenchymal (CD90+) progenitors within EDCs. N=10 EDC cell lines with 2 technical repeats. B, Flow cytometric analysis demonstrating the overall expression of IGF-1R and IR on human EDCs. Data are means  $\pm$  SEM; n=3 EDC cell lines with 2 technical repeats. C, Flow cytometry of IGF-1 receptor (IGF-1R) and insulin receptor (IR) co-expression within EDCs subpopulations. Data are means  $\pm$  SEM; n=3 EDC cell lines with 2 technical repeats.\* $p \leq 0.05$  vs. the expected frequency of IGF-1R or IR

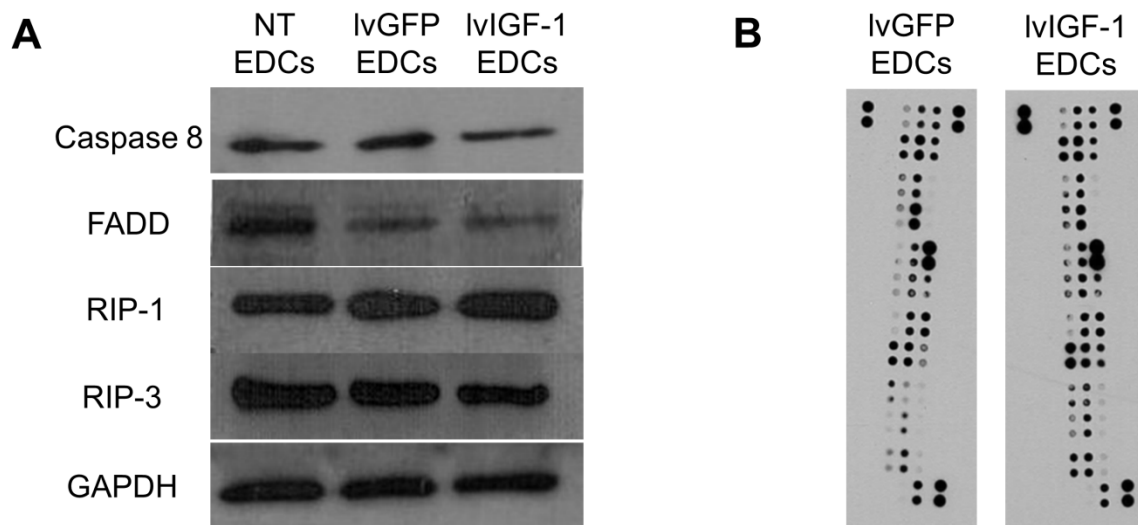

**Figure S3. Effects of lvIGF-1 EDC transplantation on apoptosis and necroptosis.** A, Representative western blot of proteins from non-transduced (NT), lvGFP and lvIGF-1 transduced EDCs involved in commitment to an apoptotic or necroptotic fate (n=3 EDC lines). B, Representative images of images taken from a commercial human apoptosis proteome profiler array of lvGFP and lvIGF-1 transduced cells.

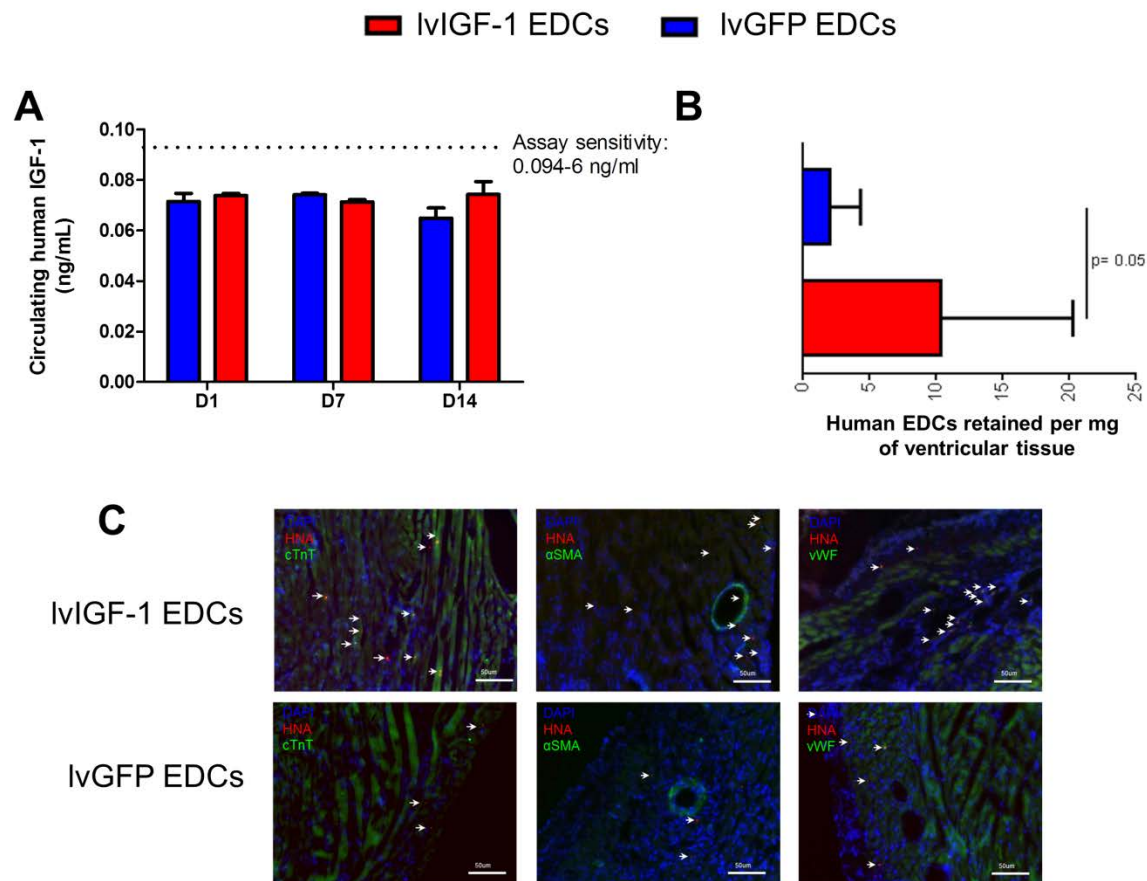

**Figure S4. Effects of lvIGF-1 EDC transplantation on systemic levels of IGF-1 and retention of transplanted EDCs.** A, Quantification of circulating human IGF-1 protein in mouse plasma after lv-GFP and lv-IGF-1 EDC transplant. B, Quantitative PCR for retained human alu sequences 28 days after myocardial infarction. C, Immunohistochemical analysis of transplanted EDC fate as defined by human nuclear antigen (HNA) co-segregation with markers of cardiomyocyte (cTnT), smooth muscle ( $\alpha$ SMA) or endothelial (vWF) lineages 21 days after intra-myocardial injection.

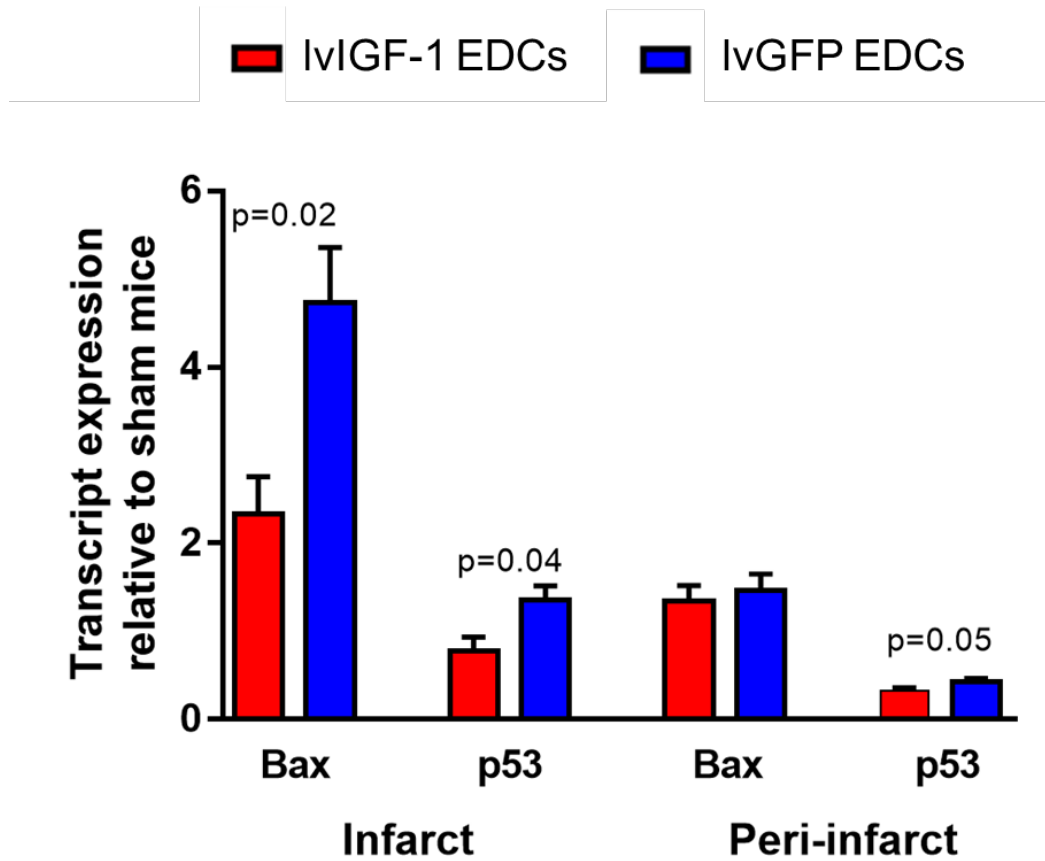

**Figure S5. Effects of lvIGF-1 EDC transplantation on pro-apoptotic transcripts in hearts immediately after SPECT quantification of apoptosis.** Two days after injection of lvIGF-1 or lvGFP EDCs hearts underwent microdissection into the infarct and peri-infarct zone for qPCR transcript analysis of Bax and p53 expression (n=3 mice).

| Column1                                                         | All patients<br>(n=10) | In vivo subset<br>(n=6) | P value<br>All patients vs. in vivo subset |
|-----------------------------------------------------------------|------------------------|-------------------------|--------------------------------------------|
| Age(yrs)                                                        | 66±3                   | 64±5                    | 0.71                                       |
| BMI (kg/m <sup>2</sup> )                                        | 29±2                   | 28±2                    | 0.83                                       |
| Gender (%male)                                                  | 90%                    | 83%                     | 1.00                                       |
| Diabetes                                                        | 50%                    | 50%                     | 1.00                                       |
| Hypertension                                                    | 70%                    | 67%                     | 1.00                                       |
| Dyslipidemia                                                    | 80%                    | 83%                     | 1.00                                       |
| Ongoing smoking                                                 | 20%                    | 17%                     | 1.00                                       |
| Thyroid disease                                                 | 0%                     | 0%                      | N/A                                        |
| Peripheral vascular disease                                     | 20%                    | 17%                     | 1.00                                       |
| Coronary artery disease                                         | 90%                    | 100%                    | 1.00                                       |
| History of MI                                                   | 50%                    | 50%                     | 1.00                                       |
| Valvular heart disease                                          | 50%                    | 33%                     | 1.00                                       |
| Congestive heart failure                                        | 10%                    | 17%                     | 1.00                                       |
| NYHA class                                                      | 1.8±0.5                | 1.5±0.5                 | 0.68                                       |
| LV ejection fraction                                            | 50±5                   | 50±5                    | 1.0                                        |
| CCS class                                                       | 3.1±0.3                | 3.4±0.4                 | 0.94                                       |
| Creatine (umol/L)                                               | 90±10                  | 92±13                   | 0.90                                       |
| Hemoglobin A1c (diabetes history: no diabetes history, %)       | 7.3±0.6:5.6±0.1*       | 6.7±0.6:5.7±0.1         | 0.58:0.75                                  |
| Fasting glucose (diabetes history: no diabetes history; mmol/L) | 6.8±0.6:5.7±0.5        | 6.3±0.8:5.9±0.9         | 0.66:0.77                                  |
| Medications:                                                    |                        |                         |                                            |
| Anti-platelet therapy                                           | 90%                    | 83%                     | 1.00                                       |
| Beta-blocker                                                    | 90%                    | 83%                     | 1.00                                       |
| Statins                                                         | 90%                    | 83%                     | 1.00                                       |
| ACEI or ARB                                                     | 30%                    | 33%                     | 1.00                                       |

**Table S1. Clinical characteristics of atrial appendage donors.** Body mass index, BMI; myocardial infarction, MI; New York Heart Association, NYHA; left ventricle, LV; Canadian Cardiovascular Society, CCS; angiotensin-converting enzyme inhibitors, ACEI; angiotensin receptor blockers, ARB. \*p≤0.05 vs. diabetic patients.

|                 |                          | End Diastolic Volume<br>( $\mu$ L) | End Systolic Volume<br>( $\mu$ L) | Stroke Volume<br>( $\mu$ L) | Ejection Fraction<br>(%) |
|-----------------|--------------------------|------------------------------------|-----------------------------------|-----------------------------|--------------------------|
| 1 week post MI  | vehicle                  | 69.8 $\pm$ 5.6                     | 48.5 $\pm$ 3.9                    | 22.3 $\pm$ 2.2              | 31.1 $\pm$ 1.8           |
|                 | lv-GFP transduced CSCs   | 73.1 $\pm$ 4.1                     | 52.3 $\pm$ 3.1                    | 20.8 $\pm$ 1.3              | 28.5 $\pm$ 1.2           |
|                 | lv-IGF-1 transduced CSCs | 70.3.7 $\pm$ 2.3                   | 49.1 $\pm$ 1.6                    | 21.2 $\pm$ 1.0              | 30.2 $\pm$ 0.9           |
| 3 weeks post MI | vehicle                  | 79.8 $\pm$ 11.2                    | 41.5 $\pm$ 9.7                    | 18.3 $\pm$ 1.8              | 25.6 $\pm$ 2.2           |
|                 | lv-GFP transduced CSCs   | 82.4 $\pm$ 8.21                    | 55.7 $\pm$ 6.0                    | 26.7 $\pm$ 2.3*             | 32.7 $\pm$ 0.6*          |
|                 | lv-IGF-1 transduced CSCs | 76.1 $\pm$ 6.3                     | 47.5 $\pm$ 4.2                    | 28.6 $\pm$ 2.2*†            | 37.8 $\pm$ 0.7*†         |
| 4 weeks post MI | vehicle                  | 85.6 $\pm$ 10.0                    | 66.4 $\pm$ 8.7                    | 19.1 $\pm$ 1.8              | 25.1 $\pm$ 1.4           |
|                 | lv-GFP transduced CSCs   | 77.1 $\pm$ 3.1                     | 48.7 $\pm$ 2.4                    | 28.5 $\pm$ 1.0*             | 37.0 $\pm$ 0.8*          |
|                 | Lv-IGF-1 transduced CSCs | 78.9 $\pm$ 4.4                     | 52.9 $\pm$ 3.7                    | 36.0 $\pm$ 1.1*†            | 41.0 $\pm$ 1.5*†         |

**Table S2. Echocardiographic measurements over the 4 week follow-up period. \* $p \leq 0.05$  vs. vehicle, † $p \leq 0.05$  vs. lvGFP transduced EDCs.**
